# Supplementary material for: Graphene highly scattered in porous carbon nanofibers: a binder-free and high-performance anode for sodium-ion batteries
Source: Royal Society of Chemistry journal article supplement (doi:10.1039/c6ta09961k), 2016-12-08
Supplement: c6ta09961k1.pdf [file c6ta09961k1.pdf]

## Supporting Information

Graphene highly-scattered in porous carbon nanofibers: a binder-free and high-performance anode for sodium-ion batteries

Yongchang Liu,<sup>ab</sup> Li-Zhen Fan\*<sup>a</sup> and Lifang Jiao\*<sup>b</sup>

<sup>a</sup>Institute of Advanced Materials and Technology, University of Science and Technology Beijing, Beijing 100083, China. E-mail: [fanlizhen@ustb.edu.cn](mailto:fanlizhen@ustb.edu.cn)

<sup>b</sup>Key Laboratory of Advanced Energy Materials Chemistry (Ministry of Education), Nankai University, Tianjin 300071, China. E-mail: [jiaolf@nankai.edu.cn](mailto:jiaolf@nankai.edu.cn)

## Supplementary Figures

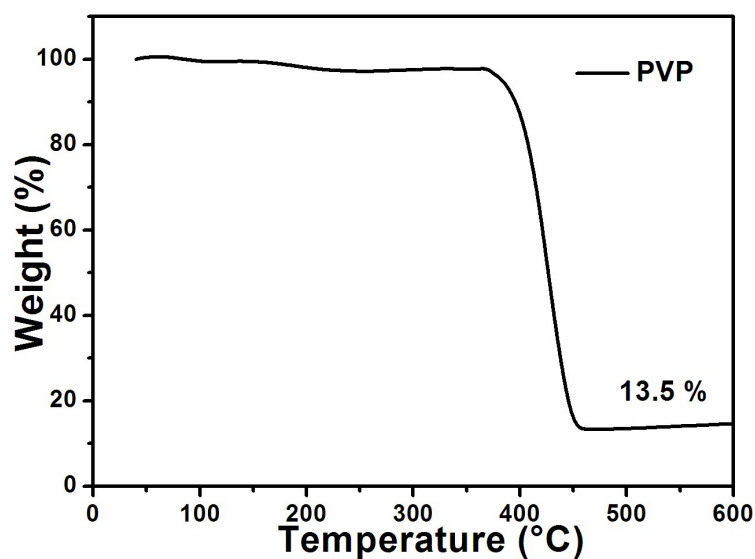

**Fig. S1** TGA curve of PVP in high purity Ar atmosphere from room temperature to 600 °C with a heating rate of 5 °C min<sup>-1</sup>.

The only 2.3% weight loss observed until 365 °C is attributed to the evaporation of adsorbed water. This indicates that PVP is stable in inert atmosphere up to 365 °C. The fast weight loss from 365 to 460 °C is assigned to the decomposition and carbonization of PVP. The residual carbon mass is about 13.5% of the pristine PVP mass.

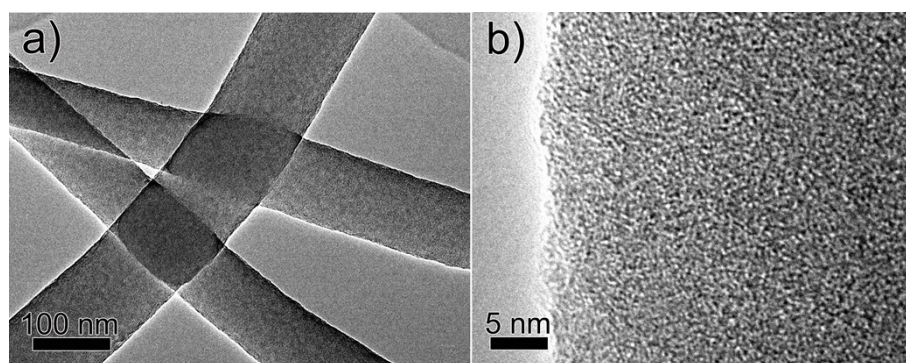

**Fig. S2** (a) TEM and (b) HRTEM images of the blank porous carbon nanofibers fabricated by heat treating the electrospun PVP at 500 °C for 1 h.

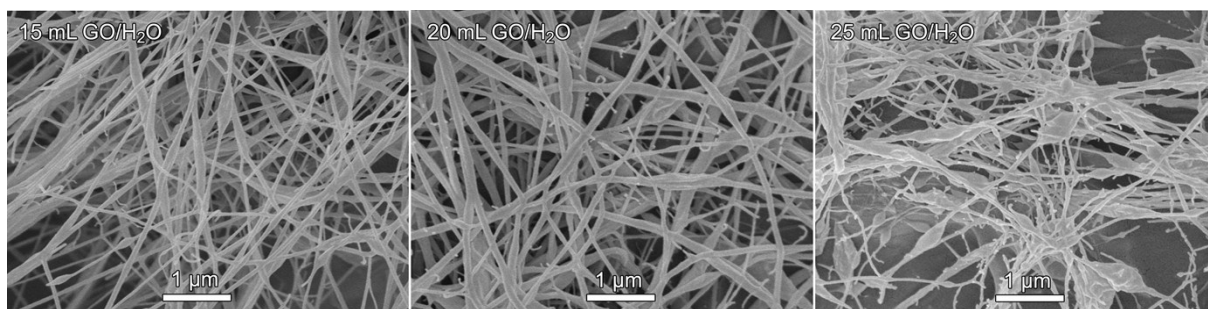

**Fig. S3** SEM images of the as-spun GO/PVP nanofibers prepared from different spinning solutions: 15 mL, 20 mL, and 25 mL GO/H<sub>2</sub>O dispersion with 1.2 g PVP.

The nanofibers electrospun from 15 mL GO/H<sub>2</sub>O with 1.2 g PVP are thinner than those from 20 mL GO/H<sub>2</sub>O with 1.2 g PVP, due to the insufficient GO content. While, excessive GO cannot be totally wrapped by PVP nanofibers (25 mL GO/H<sub>2</sub>O with 1.2 g PVP). Appropriate dosage ratio (20 mL GO/H<sub>2</sub>O with 1.2 g PVP) is very important for obtaining the smooth and continuous precursor nanofibers.

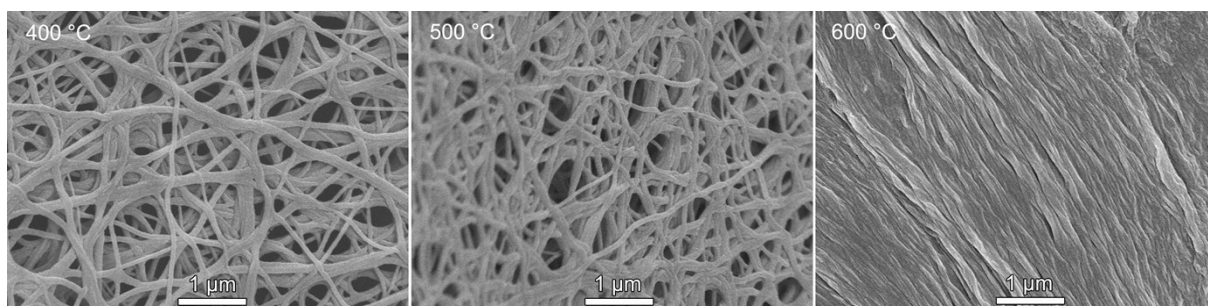

**Fig. S4** SEM images of the carbonized GO/PVP nanofibers after calcination at 400, 500, and 600 °C for 1 h.

The nanofibers calcinated at 400 °C are thicker than those calcinated at 500 °C, suggesting that a low temperature cannot completely decompose the PVP to carbon (consistent with the thermogravimetric analysis in Fig. S1). While, a high temperature (600 °C) results in aggregated large areas of graphene that is coated on the surface of carbon nanofibers. Consequently, 500 °C is the best carbonization temperature.

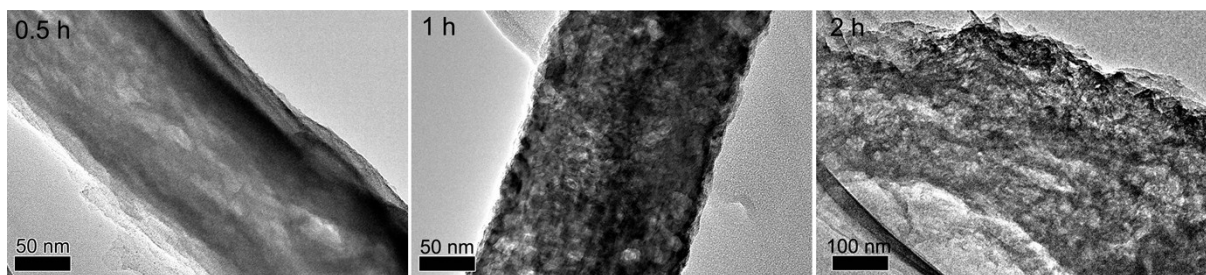

**Fig. S5** TEM images of the carbonized GO/PVP nanofibers after calcination at 500 °C for 0.5, 1, and 2 h.

The graphene nanoflakes calcinated for 0.5 h are not in full bloom compared with those calcinated for 1 h. While, a long calcinating time (2 h) leads to the agglomeration of graphene that is extended beyond the carbon nanofibers. Therefore, 1 h is the best carbonization time.

### Determination of the graphene percentage in the G/C composite

In the electrospinning fluid, 20 mL GO/H<sub>2</sub>O dispersion (concentration: 5 mg mL<sup>-1</sup>) contains 100 mg GO, in which the oxygen content is 30.76 mg and the carbon content is 69.24 mg. After the heat treatment, assuming the G/C mass is  $x$  mg, thereby the oxygen content is  $x \times 2.93\%$  mg, and the carbon content is  $x \times (1 - 2.93\%)$  mg. Considering 1.2 g PVP results in 162 mg (1200 mg  $\times$  13.5 %) carbon nanofibers, it can be concluded that  $x \times (1 - 2.93\%) = 69.24 + 162$  mg, so  $x = 238.22$  mg. Therefore, the graphene percentage in the G/C composite is calculated to be about 32 wt% ( $(238.22 - 162) / 238.22$ ).

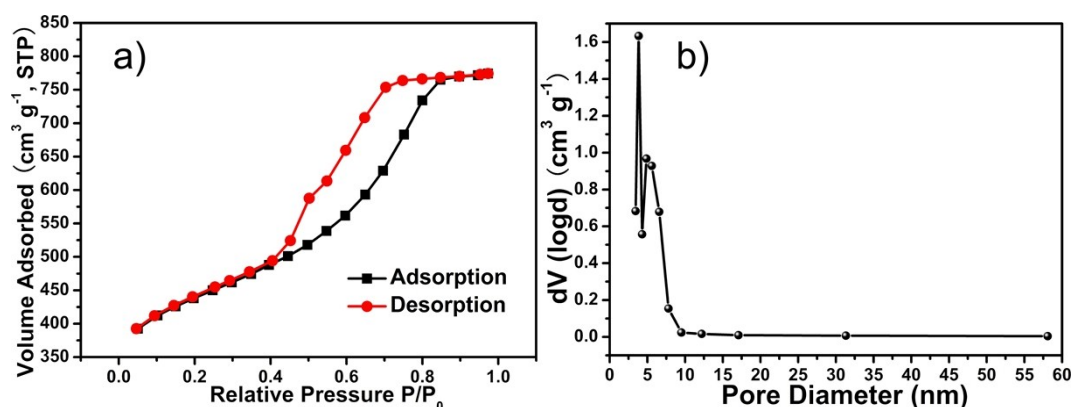

**Fig. S6** (a) N<sub>2</sub> adsorption-desorption isotherm and (b) pore size distribution curve of the pure graphene.

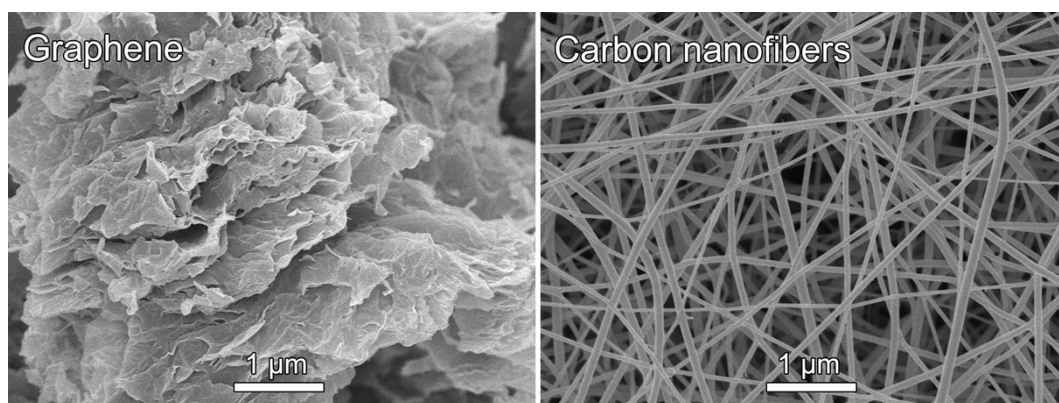

**Fig. S7** SEM images of the pure graphene nanosheets and carbon nanofibers.

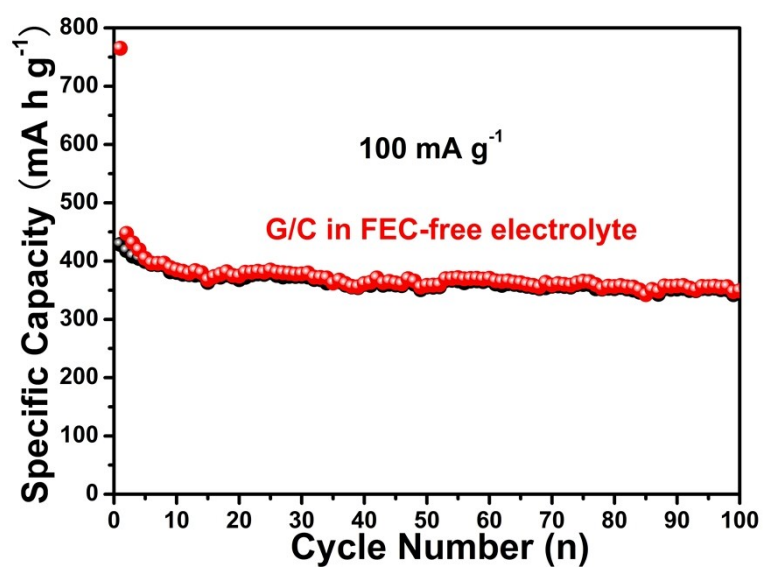

**Fig. S8** Cycling performance of the G/C electrode in FEC-free NaClO<sub>4</sub>/PC electrolyte tested between 0.01-2.5 V vs Na<sup>+</sup>/Na at a current density of 100 mA g<sup>-1</sup>.

The initial discharge and charge capacities are 765 and 428.6 mA h g<sup>-1</sup>, respectively. While the reversible capacity decreases rapidly to 368.1 mA h g<sup>-1</sup> in the 20<sup>th</sup> cycle, and retains only 346.5 mA h g<sup>-1</sup> after 100 cycles.



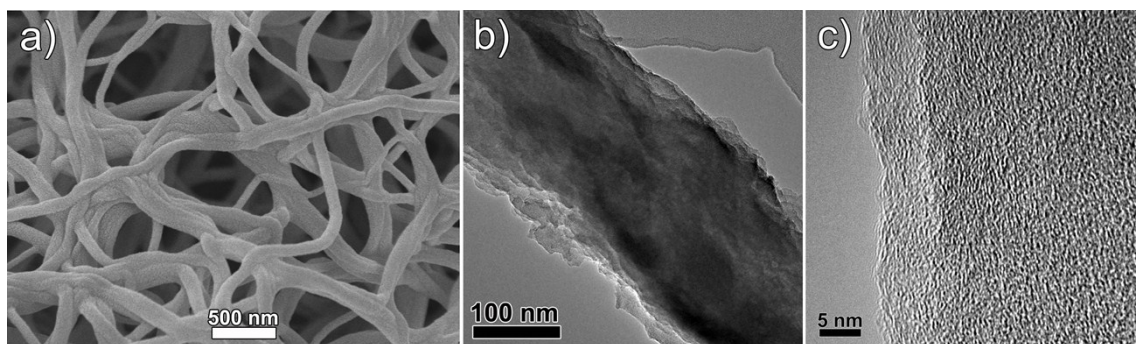

**Fig. S9** (a) SEM, (b) TEM, and (c) HRTEM images of the G/C electrode charged at 2.5 V after 300 cycles tested as Fig. 5d.

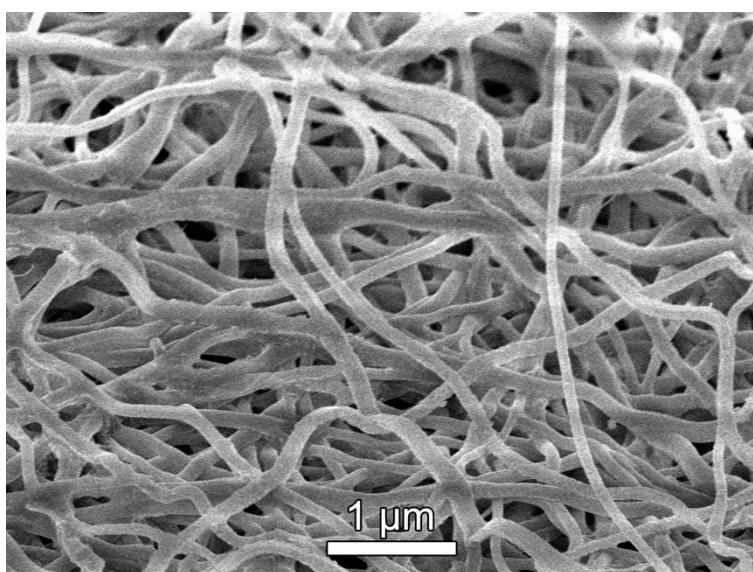

**Fig. S10** SEM image of the G/C electrode charged at 2.5 V after 1000 cycles tested at 2000 mA g<sup>-1</sup>.

**Table S1** Comparison of the results in this study with reported performance of the carbon-based materials (including hard carbon, graphene, graphite, heteroatom-doped carbon, and their composites) as SIB anodes.

| Sample                                                         | Rate capability                                                                                                                                                                                                                                                                                                                                                                              | Cyclic stability                                                                                                                                                                                                         | Reference |
|----------------------------------------------------------------|----------------------------------------------------------------------------------------------------------------------------------------------------------------------------------------------------------------------------------------------------------------------------------------------------------------------------------------------------------------------------------------------|--------------------------------------------------------------------------------------------------------------------------------------------------------------------------------------------------------------------------|-----------|
| <b>Carbonized peat moss</b>                                    | 306 mA h g <sup>-1</sup> at 50 mA g <sup>-1</sup><br>298 mA h g <sup>-1</sup> at 100 mA g <sup>-1</sup><br>203 mA h g <sup>-1</sup> at 500 mA g <sup>-1</sup><br>150 mA h g <sup>-1</sup> at 1000 mA g <sup>-1</sup><br>106 mA h g <sup>-1</sup> at 2000 mA g <sup>-1</sup><br>66 mA h g <sup>-1</sup> at 5000 mA g <sup>-1</sup>                                                            | 255 mA h g <sup>-1</sup> at 100 mA g <sup>-1</sup><br>(200 cycles)                                                                                                                                                       | 1         |
| <b>Reduced graphene oxide</b>                                  | 217.2 mA h g <sup>-1</sup> at 40 mA g <sup>-1</sup><br>176.4 mA h g <sup>-1</sup> at 80 mA g <sup>-1</sup><br>150.9 mA h g <sup>-1</sup> at 200 mA g <sup>-1</sup><br>118.7 mA h g <sup>-1</sup> at 400 mA g <sup>-1</sup><br>95.6 mA h g <sup>-1</sup> at 1000 mA g <sup>-1</sup>                                                                                                           | 174.3 mA h g <sup>-1</sup> at 40 mA g <sup>-1</sup><br>93.3 mA h g <sup>-1</sup> at 200 mA g <sup>-1</sup><br>(250 cycles)<br>141 mA h g <sup>-1</sup> at 40 mA g <sup>-1</sup><br>(1000 cycles)                         | 2         |
| <b>Expanded graphite</b>                                       | 284 mA h g <sup>-1</sup> at 20 mA g <sup>-1</sup><br>184 mA h g <sup>-1</sup> at 100 mA g <sup>-1</sup><br>91 mA h g <sup>-1</sup> at 200 mA g <sup>-1</sup>                                                                                                                                                                                                                                 | 73.92% capacity retention at<br>100 mA g <sup>-1</sup> (2000 cycles)                                                                                                                                                     | 3         |
| <b>Hollow carbon nanospheres</b>                               | 223 mA h g <sup>-1</sup> at 50 mA g <sup>-1</sup><br>168 mA h g <sup>-1</sup> at 200 mA g <sup>-1</sup><br>142 mA h g <sup>-1</sup> at 500 mA g <sup>-1</sup><br>120 mA h g <sup>-1</sup> at 1000 mA g <sup>-1</sup><br>100 mA h g <sup>-1</sup> at 2000 mA g <sup>-1</sup><br>75 mA h g <sup>-1</sup> at 5000 mA g <sup>-1</sup><br>~50 mA h g <sup>-1</sup> at 10000 mA g <sup>-1</sup>    | ~160 mA h g <sup>-1</sup> at 100 mA g <sup>-1</sup><br>(100 cycles)                                                                                                                                                      | 4         |
| <b>Microporous carbon nanospheres</b>                          | 223 mA h g <sup>-1</sup> at 20 mA g <sup>-1</sup><br>190 mA h g <sup>-1</sup> at 200 mA g <sup>-1</sup><br>130 mA h g <sup>-1</sup> at 100 mA g <sup>-1</sup><br>98 mA h g <sup>-1</sup> at 200 mA g <sup>-1</sup><br>85 mA h g <sup>-1</sup> at 400 mA g <sup>-1</sup><br>67 mA h g <sup>-1</sup> at 1000 mA g <sup>-1</sup>                                                                | 115 mA h g <sup>-1</sup> at 200 mA g <sup>-1</sup><br>(1000 cycles)                                                                                                                                                      | 5         |
| <b>Sandwich-like hierarchically carbon /graphene composite</b> | 670 mA h g <sup>-1</sup> at 50 mA g <sup>-1</sup>                                                                                                                                                                                                                                                                                                                                            | 400 mA h g <sup>-1</sup> at 50 mA g <sup>-1</sup><br>(100 cycles)<br>250 mA h g <sup>-1</sup> at 1000 mA g <sup>-1</sup><br>(1000 cycles)                                                                                | 6         |
| <b>3D nitrogen-doped graphene foams</b>                        | 1057.1 mA h g <sup>-1</sup> at 100 mA g <sup>-1</sup><br>943.5 mA h g <sup>-1</sup> at 200 mA g <sup>-1</sup><br>815.2 mA h g <sup>-1</sup> at 500 mA g <sup>-1</sup><br>467.1 mA h g <sup>-1</sup> at 1000 mA g <sup>-1</sup><br>244.7 mA h g <sup>-1</sup> at 2000 mA g <sup>-1</sup><br>137.7 mA h g <sup>-1</sup> at 5000 mA g <sup>-1</sup>                                             | 594 mA h g <sup>-1</sup> at 500 mA g <sup>-1</sup><br>(150 cycles)                                                                                                                                                       | 7         |
| <b>3D porous carbon frameworks</b>                             | 290 mA h g <sup>-1</sup> at 200 mA g <sup>-1</sup><br>253 mA h g <sup>-1</sup> at 500 mA g <sup>-1</sup><br>200 mA h g <sup>-1</sup> at 1000 mA g <sup>-1</sup><br>166 mA h g <sup>-1</sup> at 2000 mA g <sup>-1</sup><br>130 mA h g <sup>-1</sup> at 5000 mA g <sup>-1</sup><br>104 mA h g <sup>-1</sup> at 10000 mA g <sup>-1</sup><br>90 mA h g <sup>-1</sup> at 20000 mA g <sup>-1</sup> | 256.5 mA h g <sup>-1</sup> at 500 mA g <sup>-1</sup><br>(500 cycles)<br>150.1 mA h g <sup>-1</sup> at 2500 mA g <sup>-1</sup><br>(3000 cycles)<br>99.8 mA h g <sup>-1</sup> at 5000 mA g <sup>-1</sup><br>(10000 cycles) | 8         |

|                                                     |                                                                                                                                                                                                                                                                                                                                                                                           |                                                                                                                                          |    |
|-----------------------------------------------------|-------------------------------------------------------------------------------------------------------------------------------------------------------------------------------------------------------------------------------------------------------------------------------------------------------------------------------------------------------------------------------------------|------------------------------------------------------------------------------------------------------------------------------------------|----|
| <b>Hard carbon</b>                                  | ~250 mA h g <sup>-1</sup> at 25 mA g <sup>-1</sup>                                                                                                                                                                                                                                                                                                                                        | ~230 mA h g <sup>-1</sup> at 25 mA g <sup>-1</sup><br>(100 cycles)                                                                       | 9  |
| <b>Amorphous carbon</b>                             | 254 mA h g <sup>-1</sup> at 30 mA g <sup>-1</sup><br>212 mA h g <sup>-1</sup> at 150 mA g <sup>-1</sup><br>162 mA h g <sup>-1</sup> at 300 mA g <sup>-1</sup>                                                                                                                                                                                                                             | 226 mA h g <sup>-1</sup> at 30 mA g <sup>-1</sup><br>(150 cycles)                                                                        | 10 |
| <b>Hollow carbon nanowires</b>                      | 252 mA h g <sup>-1</sup> at 50 mA g <sup>-1</sup><br>238 mA h g <sup>-1</sup> at 125 mA g <sup>-1</sup><br>216 mA h g <sup>-1</sup> at 250 mA g <sup>-1</sup><br>149 mA h g <sup>-1</sup> at 500 mA g <sup>-1</sup>                                                                                                                                                                       | 206.3 mA h g <sup>-1</sup> at 50 mA g <sup>-1</sup><br>(400 cycles)                                                                      | 11 |
| <b>Graphene-templated carbon</b>                    | 205 mA h g <sup>-1</sup> at 200 mA g <sup>-1</sup><br>150 mA h g <sup>-1</sup> at 500 mA g <sup>-1</sup><br>118 mA h g <sup>-1</sup> at 1000 mA g <sup>-1</sup><br>97 mA h g <sup>-1</sup> at 2000 mA g <sup>-1</sup><br>68 mA h g <sup>-1</sup> at 5000 mA g <sup>-1</sup><br>45 mA h g <sup>-1</sup> at 10000 mA g <sup>-1</sup>                                                        | 190 mA h g <sup>-1</sup> at 200 mA g <sup>-1</sup><br>(2000 cycles)                                                                      | 12 |
| <b>Cellulose derived carbon nanofibers</b>          | 262.9 mA h g <sup>-1</sup> at 40 mA g <sup>-1</sup><br>85 mA h g <sup>-1</sup> at 2000 mA g <sup>-1</sup>                                                                                                                                                                                                                                                                                 | 176 mA h g <sup>-1</sup> at 200 mA g <sup>-1</sup><br>(600 cycles)                                                                       | 13 |
| <b>Electrospun carbon nanofibers</b>                | 233 mA h g <sup>-1</sup> at 50 mA g <sup>-1</sup><br>180 mA h g <sup>-1</sup> at 100 mA g <sup>-1</sup><br>173 mA h g <sup>-1</sup> at 200 mA g <sup>-1</sup><br>136 mA h g <sup>-1</sup> at 500 mA g <sup>-1</sup><br>113 mA h g <sup>-1</sup> at 1000 mA g <sup>-1</sup><br>82 mA h g <sup>-1</sup> at 2000 mA g <sup>-1</sup>                                                          | 169 mA h g <sup>-1</sup> at 200 mA g <sup>-1</sup><br>(200 cycles)                                                                       | 14 |
| <b>Functionalized N-doped carbon nanofibers</b>     | 172 mA h g <sup>-1</sup> at 50 mA g <sup>-1</sup><br>150 mA h g <sup>-1</sup> at 200 mA g <sup>-1</sup><br>139 mA h g <sup>-1</sup> at 500 mA g <sup>-1</sup><br>132 mA h g <sup>-1</sup> at 1000 mA g <sup>-1</sup><br>121 mA h g <sup>-1</sup> at 2000 mA g <sup>-1</sup><br>100 mA h g <sup>-1</sup> at 5000 mA g <sup>-1</sup><br>87 mA h g <sup>-1</sup> at 10000 mA g <sup>-1</sup> | 134.2 mA h g <sup>-1</sup> at 200 mA g <sup>-1</sup><br>(200 cycles)                                                                     | 15 |
| <b>Electrospun nitrogen-doped carbon nanofibers</b> | 293 mA h g <sup>-1</sup> at 50 mA g <sup>-1</sup><br>159 mA h g <sup>-1</sup> at 1000 mA g <sup>-1</sup>                                                                                                                                                                                                                                                                                  | 254 mA h g <sup>-1</sup> at 50 mA g <sup>-1</sup><br>150 mA h g <sup>-1</sup> at 1000 mA g <sup>-1</sup><br>(200 cycles)                 | 16 |
| <b>Porous carbon nanofibers</b>                     | 280 mA h g <sup>-1</sup> at 50 mA g <sup>-1</sup><br>200 mA h g <sup>-1</sup> at 1000 mA g <sup>-1</sup><br>164 mA h g <sup>-1</sup> at 2000 mA g <sup>-1</sup><br>90 mA h g <sup>-1</sup> at 5000 mA g <sup>-1</sup><br>60 mA h g <sup>-1</sup> at 10000 mA g <sup>-1</sup><br>40 mA h g <sup>-1</sup> at 20000 mA g <sup>-1</sup>                                                       | 266 mA h g <sup>-1</sup> at 50 mA g <sup>-1</sup><br>(100 cycles)<br>140 mA h g <sup>-1</sup> at 500 mA g <sup>-1</sup><br>(1000 cycles) | 17 |



|                                                                  |                                                                                                                                                                                                                                                                                                                                                                                                                                                  |                                                                                                                                                                                                                        |              |
|------------------------------------------------------------------|--------------------------------------------------------------------------------------------------------------------------------------------------------------------------------------------------------------------------------------------------------------------------------------------------------------------------------------------------------------------------------------------------------------------------------------------------|------------------------------------------------------------------------------------------------------------------------------------------------------------------------------------------------------------------------|--------------|
| <b>N,O-dual doped carbon network</b>                             | 650 mA h g <sup>-1</sup> at 100 mA g <sup>-1</sup><br>501 mA h g <sup>-1</sup> at 200 mA g <sup>-1</sup><br>344 mA h g <sup>-1</sup> at 500 mA g <sup>-1</sup><br>264 mA h g <sup>-1</sup> at 800 mA g <sup>-1</sup><br>235 mA h g <sup>-1</sup> at 1000 mA g <sup>-1</sup><br>197 mA h g <sup>-1</sup> at 2000 mA g <sup>-1</sup><br>180 mA h g <sup>-1</sup> at 3000 mA g <sup>-1</sup><br>161 mA h g <sup>-1</sup> at 5000 mA g <sup>-1</sup> | 545 mA h g <sup>-1</sup> at 100 mA g <sup>-1</sup><br>(100 cycles)<br>240 mA h g <sup>-1</sup> at 2000 mA g <sup>-1</sup><br>(2000 cycles)                                                                             | 18           |
| <b>Nitrogen-doped carbon nanofiber film</b>                      | 315 mA h g <sup>-1</sup> at 500 mA g <sup>-1</sup><br>~275 mA h g <sup>-1</sup> at 1000 mA g <sup>-1</sup><br>~170 mA h g <sup>-1</sup> at 10000 mA g <sup>-1</sup><br>154 mA h g <sup>-1</sup> at 15000 mA g <sup>-1</sup>                                                                                                                                                                                                                      | 377 mA h g <sup>-1</sup> at 100 mA g <sup>-1</sup><br>(100 cycles)<br>210 mA h g <sup>-1</sup> at 5000 mA g <sup>-1</sup><br>(7000 cycles)                                                                             | 19           |
| <b>Graphene/nitrogen-doped porous carbon nanofiber composite</b> | 557.1 mA h g <sup>-1</sup> at 50 mA g <sup>-1</sup><br>180.1 mA h g <sup>-1</sup> at 100 mA g <sup>-1</sup><br>115.7 mA h g <sup>-1</sup> at 800 mA g <sup>-1</sup><br>104 mA h g <sup>-1</sup> at 1600 mA g <sup>-1</sup>                                                                                                                                                                                                                       | 175.9 mA h g <sup>-1</sup> at 100 mA g <sup>-1</sup><br>130 mA h g <sup>-1</sup> at 200 mA g <sup>-1</sup><br>(300 cycles)<br>97.7 mA h g <sup>-1</sup> at 1000 mA g <sup>-1</sup><br>(500 cycles)                     | 20           |
| <b>Nitrogen-doped carbon/graphene</b>                            | 336 mA h g <sup>-1</sup> at 30 mA g <sup>-1</sup><br>274 mA h g <sup>-1</sup> at 100 mA g <sup>-1</sup><br>249 mA h g <sup>-1</sup> at 200 mA g <sup>-1</sup><br>207 mA h g <sup>-1</sup> at 500 mA g <sup>-1</sup><br>177 mA h g <sup>-1</sup> at 1000 mA g <sup>-1</sup><br>139 mA h g <sup>-1</sup> at 2000 mA g <sup>-1</sup><br>94 mA h g <sup>-1</sup> at 5000 mA g <sup>-1</sup>                                                          | 270 mA h g <sup>-1</sup> at 50 mA g <sup>-1</sup><br>(200 cycles)                                                                                                                                                      | 21           |
| <b>Graphite</b>                                                  | ~100 mA h g <sup>-1</sup> at 37.2 mA g <sup>-1</sup>                                                                                                                                                                                                                                                                                                                                                                                             | ~75 mA h g <sup>-1</sup> at 37.2 mA g <sup>-1</sup><br>(1000 cycles)                                                                                                                                                   | 22           |
| <b>Porous nitrogen-doped carbon sphere</b>                       | 237 mA h g <sup>-1</sup> at 100 mA g <sup>-1</sup><br>215 mA h g <sup>-1</sup> at 200 mA g <sup>-1</sup><br>184 mA h g <sup>-1</sup> at 500 mA g <sup>-1</sup><br>155 mA h g <sup>-1</sup> at 1000 mA g <sup>-1</sup>                                                                                                                                                                                                                            | 206 mA h g <sup>-1</sup> at 200 mA g <sup>-1</sup><br>(600 cycles)                                                                                                                                                     | 23           |
| <b>Hard carbon nanoparticles</b>                                 | 275 mA h g <sup>-1</sup> at 25 mA g <sup>-1</sup><br>266 mA h g <sup>-1</sup> at 50 mA g <sup>-1</sup><br>236 mA h g <sup>-1</sup> at 125 mA g <sup>-1</sup><br>181 mA h g <sup>-1</sup> at 250 mA g <sup>-1</sup><br>72 mA h g <sup>-1</sup> at 1250 mA g <sup>-1</sup><br>45 mA h g <sup>-1</sup> at 2500 mA g <sup>-1</sup>                                                                                                                   | 207 mA h g <sup>-1</sup> at 50 mA g <sup>-1</sup><br>(500 cycles)                                                                                                                                                      | 24           |
| <b>S-doped N-rich carbon nanosheets</b>                          | 350 mA h g <sup>-1</sup> at 50 mA g <sup>-1</sup><br>300 mA h g <sup>-1</sup> at 100 mA g <sup>-1</sup><br>280 mA h g <sup>-1</sup> at 200 mA g <sup>-1</sup><br>250 mA h g <sup>-1</sup> at 500 mA g <sup>-1</sup><br>220 mA h g <sup>-1</sup> at 1000 mA g <sup>-1</sup><br>190 mA h g <sup>-1</sup> at 2000 mA g <sup>-1</sup><br>150 mA h g <sup>-1</sup> at 5000 mA g <sup>-1</sup><br>110 mA h g <sup>-1</sup> at 10000 mA g <sup>-1</sup> | 211 mA h g <sup>-1</sup> at 1000 mA g <sup>-1</sup><br>(1000 cycles)                                                                                                                                                   | 25           |
| <b>G/C nanofibers</b>                                            | 429.4 mA h g <sup>-1</sup> at 100 mA g <sup>-1</sup><br>401.7 mA h g <sup>-1</sup> at 200 mA g <sup>-1</sup><br>371.5 mA h g <sup>-1</sup> at 500 mA g <sup>-1</sup><br>342 mA h g <sup>-1</sup> at 1000 mA g <sup>-1</sup><br>324.5 mA h g <sup>-1</sup> at 2000 mA g <sup>-1</sup><br>291.4 mA h g <sup>-1</sup> at 5000 mA g <sup>-1</sup><br>261.1 mA h g <sup>-1</sup> at 10000 mA g <sup>-1</sup>                                          | 408.8 mA h g <sup>-1</sup> at 100 mA g <sup>-1</sup><br>(100 cycles)<br>382.8 mA h g <sup>-1</sup> at 500 mA g <sup>-1</sup><br>(300 cycles)<br>300.8 mA h g <sup>-1</sup> at 2000 mA g <sup>-1</sup><br>(1000 cycles) | Present work |

## Supplementary References

- 1 J. Ding, H. Wang, Z. Li, A. Kohandehghan, K. Cui, Z. Xu, B. Zahiri, X. Tan, E. M. Lotfabad, B. C. Olsen and D. Mitlin, *ACS Nano*, 2013, **7**, 11004.
- 2 Y.-X. Wang, S.-L. Chou, H.-K. Liu and S.-X. Dou, *Carbon*, 2013, **57**, 202.
- 3 Y. Wen, K. He, Y. Zhu, F. Han, Y. Xu, I. Matsuda, Y. Ishii, J. Cumings and C. S. Wang, *Nat. Commun.*, 2014, **5**, 4033.
- 4 K. Tang, L. Fu, R. J. White, L. Yu, M.-M. Titirici, M. Antonietti and J. Maier, *Adv. Energy Mater.*, 2012, **2**, 873.
- 5 D. Zhou, M. Peer, Z. Yang, V. G. Pol, F. D. Key, J. Jorne, H. C. Foley and C. S. Johnson, *J. Mater. Chem. A*, 2016, **4**, 6271.
- 6 Y. Yan, Y.-X. Yin, Y.-G. Guo and L.-J. Wan, *Adv. Energy Mater.*, 2014, **4**, 1301584.
- 7 J. Xu, M. Wang, N. P. Wickramaratne, M. Jaroniec, S. X. Dou and L. M. Dai, *Adv. Mater.*, 2015, **27**, 2042.
- 8 H. Hou, C. E. Banks, M. Jing, Y. Zhang and X. B. Ji, *Adv. Mater.*, 2015, **27**, 7861.
- 9 S. Komaba, W. Murata, T. Ishikawa, N. Yabuuchi, T. Ozeki, T. Nakayama, A. Ogata, K. Gotoh and K. Fujiwara, *Adv. Funct. Mater.*, 2011, **21**, 3859.
- 10 Y. Li, Y.-S. Hu, H. Li, L. Q. Chen and X. J. Huang, *J. Mater. Chem. A*, 2016, **4**, 96.
- 11 Y. L. Cao, L. Xiao, M. L. Sushko, W. Wang, B. Schwenzer, J. Xiao, Z. Nie, L. V. Saraf, Z. Yang and J. Liu, *Nano Lett.*, 2012, **12**, 3783.
- 12 X. S. Zhou, X. Zhu, X. Liu, Y. Xu, Y. Liu, Z. H. Dai and J. C. Bao, *J. Phys. Chem. C*, 2014, **118**, 22426.
- 13 W. Luo, J. Schardt, C. Bommier, B. Wang, J. Razink, J. Simonsen and X. L. Ji, *J. Mater. Chem. A*, 2013, **1**, 10662.
- 14 T. Chen, Y. Liu, L. Pan, T. Lu, Y. Yao, Z. Sun, D. H. C. Chua and Q. Chen, *J. Mater. Chem. A*, 2014, **2**, 4117.
- 15 Z. Wang, L. Qie, L. Yuan, W. Zhang, X. L. Hu and Y. H. Huang, *Carbon*, 2013, **55**, 328.

- 16 J. Zhu, C. Chen, Y. Lu, Y. Ge, H. Jiang, K. Fu and X. W. Zhang, *Carbon*, 2015, **94**, 189.
- 17 W. Li, L. Zeng, Z. Yang, L. Gu, J. Wang, X. Liu, J. Cheng and Y. Yu, *Nanoscale*, 2014, **6**, 693.
- 18 M. Wang, Z. Yang, W. Li, L. Gu and Y. Yu, *Small*, 2016, **12**, 2559.
- 19 S. Wang, L. Xia, L. Yu, L. Zhang, H. H. Wang and X. W. Lou, *Adv. Energy Mater.*, 2016, **6**, 1502217.
- 20 J. Zhang, Z. Zhang and X. Zhao, *RSC Adv.*, 2015, **5**, 104822.
- 21 H. Liu, M. Jia, B. Cao, R. J. Chen, X. Lv, R. Tang, F. Wu and B. Xu, *J. Power Sources*, 2016, **319**, 195.
- 22 B. Jache and P. Adelhelm, *Angew. Chem. Int. Ed.*, 2014, **53**, 10169.
- 23 D. Li, H. Chen, G. Liu, M. Wei, L.-X. Ding, S. Wang and H. Wang, *Carbon*, 2015, **94**, 888.
- 24 L. F. Xiao, Y. L. Cao, W. A. Henderson, M. L. Sushko, Y. Shao, J. Xiao, W. Wang, M. H. Engelhard, Z. Nie and J. Liu, *Nano Energy*, 2016, **19**, 279.
- 25 J. Yang, X. Zhou, D. Wu, X. Zhao and Z. Zhou, *Adv. Mater.*, 2016, DOI: [10.1002/adma.201604108](https://doi.org/10.1002/adma.201604108).
